# Supplementary material
Source: ML conference proceedings conference paper supplement (https://openreview.net/forum?id=254NJe9JEw)
Supplement: supplementary_material [file attachment]

Table S1 part 1

| Complexify | Sin-cos encoding | LPF cutoff Freq. | Gate | Combine freqs | Loss   |
|------------|------------------|------------------|------|---------------|--------|
| 0          | 1                | 100              | 1    | 1             | 0.1389 |
| 0          | 1                | 100              | 0    | 0             | 0.1414 |
| 1          | 0                | 100              | 1    | 0             | 0.1421 |
| 0          | 0                | 210              | 0    | 0             | 0.1423 |
| 1          | 1                | 100              | 1    | 0             | 0.1426 |
| 0          | 1                | 210              | 1    | 0             | 0.1435 |
| 0          | 1                | 100              | 1    | 0             | 0.1447 |
| 0          | 0                | 100              | 0    | 0             | 0.1448 |
| 0          | 0                | 210              | 0    | 1             | 0.1449 |
| 0          | 1                | 100              | 0    | 1             | 0.1451 |
| 0          | 0                | 210              | 1    | 1             | 0.1457 |
| 0          | 0                | 210              | 1    | 0             | 0.1459 |
| 0          | 0                | 210              | 1    | 1             | 0.1462 |
| 0          | 1                | 210              | 0    | 0             | 0.1465 |
| 0          | 0                | 100              | 1    | 1             | 0.1473 |
| 1          | 1                | 210              | 1    | 0             | 0.1476 |
| 0          | 0                | 210              | 0    | 1             | 0.1485 |
| 1          | 0                | 210              | 1    | 0             | 0.1485 |
| :          | :                | :                | :    | :             | :      |
| :          | :                | :                | :    | :             | :      |

Table S1 (continued)

| Complexity | Sin-cos encoding | LPF cutoff Freq. | Gate | Combine freq | Loss   |
|------------|------------------|------------------|------|--------------|--------|
| 0          | 0                | 100              | 0    | 1            | 0.1499 |
| 0          | 0                | 210              | 0    | 0            | 0.1515 |
| 0          | 1                | 210              | 1    | 0            | 0.1518 |
| 0          | 1                | 210              | 0    | 1            | 0.1533 |
| 0          | 0                | 210              | 1    | 0            | 0.1557 |
| 0          | 1                | 20               | 1    | 1            | 0.1574 |
| 0          | 0                | 20               | 1    | 1            | 0.1614 |
| 0          | 1                | 20               | 1    | 0            | 0.1620 |
| 0          | 1                | 20               | 0    | 1            | 0.1631 |
| 1          | 0                | 210              | 1    | 0            | 0.1633 |
| 1          | 0                | 210              | 1    | 0            | 0.1633 |
| 0          | 0                | 20               | 0    | 0            | 0.1645 |
| 1          | 1                | 20               | 1    | 0            | 0.1655 |
| 0          | 0                | 20               | 0    | 1            | 0.1663 |
| 1          | 0                | 20               | 1    | 0            | 0.1667 |
| 1          | 0                | 20               | 1    | 0            | 0.1667 |
| 0          | 1                | 20               | 0    | 0            | 0.1676 |
| 0          | 0                | 20               | 1    | 0            | 0.1737 |
| 0          | 0                | 100              | 1    | 0            | 0.1491 |

**Table S1: Ablation Study.** In a series of tests, we examined the importance of each building block in the Adaptive-Spectrum-Layer (ASL). The results are sorted by the validation loss. Each column represents one building block with 1=used, 0=absent, or its specific value (LPF cutoff frequency). **Complexify** represents a module that learns new complex vectors from the given complex FFT. **sin-cos-encoding** represents using the sine and cosine values of the phase or just an angle. **Gate** represents a GLU-like mechanism in Fourier space (or a simple FC instead). **Combine freqs** represents using a separate projection layer on each FFT bin, or a single one

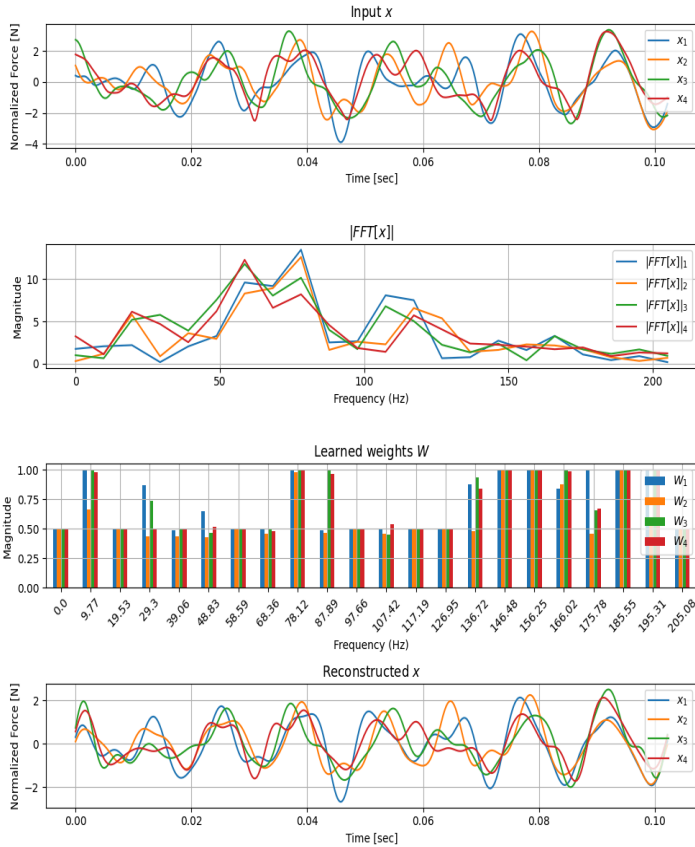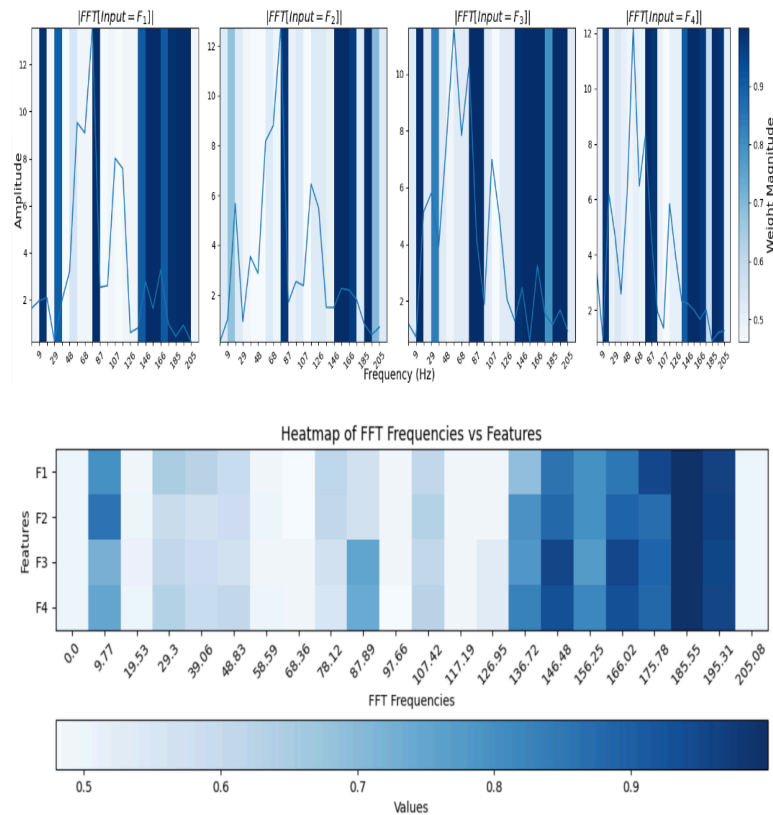

**Figure S1: Fourier Bins and Attention in Fourier Space.** (Left) An example of input propagation through a pre-trained Seq2Seq with ASL - Each bin in FFT space is multiplied by a bounded weight, and the reconstructed input is the inverse-FFT of the new representation. (Right) An example of per-feature attention weights in Fourier space of a pre-trained Seq2seq with ASL, alongside the averaged weight in a series of sliding windows. In this example, we identify three regions of interest - Low (~10Hz). Medium (~90Hz) and High (150-200Hz)
